# Supplementary material for: Contraceptive Use and the Risk of Ectopic Pregnancy: A Multi-Center Case-Control Study
Source: PLoS One. 2014 Dec 10;9(12):e115031. doi: 10.1371/journal.pone.0115031 (PMC4262460; doi:10.1371/journal.pone.0115031)
Supplement: S1 Table — The association between intrauterine pregnancy risk and contraceptive method used in the current cycle. (XLSX) [file pone.0115031.s001.xlsx]

## Sheet: Sheet2
Table S1 The risk of contraceptive failure of different methods
	IUP		NonP		OR [95%CI]	AOR [95%CI] b
	n a	(%)	n a	(%)	IUP vs. NonP	IUP vs. NonP
Current contraception
No	1585	65.77	272	11.33	Reference	Reference
Condom	307	12.74	1251	52.13	0.042 [0.035, 0.050]	0.038 [0.031, 0.046]
Withdrawal method	89	3.69	133	5.54	0.115 [0.085, 0.155]	0.096 [0.070, 0.132]
Calendar rhythm method	251	10.41	77	3.21	0.559 [0.420, 0.745]	0.536 [0.397, 0.724]
OCPs	7	0.29	34	1.42	0.035 [0.016, 0.081]	0.034 [0.015, 0.078]
LNG-EC	145	6.02	96	4	0.259 [0.194, 0.346]	0.218 [0.161, 0.295]
IUD	24	1	470	19.58	0.009 [0.006, 0.013]	0.008 [0.005, 0.012]
Tubal sterilization	2	0.08	67	2.79	0.005 [0.001, 0.021]	0.005 [0.001, 0.022]
EP, Ectopic Pregnancy; IUP, Intrauterine Pregnancy; NonP, Non-pregnancy; OR, Odds Ratio; AOR, Adjusted Odds Ratio; CI, Confidence interval; OCPs, Oral contraceptive pills; LNG-EC, Levonorgestrel emergency contraception; IUD, Intrauterine device.
a The sum does not necessarily equal the sample size for all variables because of missing data.
b Odds ratio adjusted for age, birth place, current address, education attainment, occupation, parity, previous ectopic pregnancy, previous pelvic inflammatory disease, serum Chlamydia trachomatis IgG test, previous infertility, previous adnexal surgery, previous appendectomy, previous use of contraceptives including condom, withdrawal method, calendar rhythm method, OCPs, LNG-EC, tubal steriliza…
