# Supplementary material for: Contraceptive Use and the Risk of Ectopic Pregnancy: A Multi-Center Case-Control Study
Source: PLoS One. 2014 Dec 10;9(12):e115031. doi: 10.1371/journal.pone.0115031 (PMC4262460; doi:10.1371/journal.pone.0115031)
Supplement: S2 Table — Sociodemographic characteristics of the current users of each contraceptive method. (XLSX) [file pone.0115031.s002.xlsx]

## Sheet: Sheet1
Table S2 Socio-demographic characteristics among current users of each method
	Condom and other behavior methods		OCPs		LNG-EC		IUD		Tubal sterilization		P
	n a	(%) b	n a	(%) b	n a	(%) b	n a	(%) b	n a	(%) b
Age (year)
≤20	24	70.59	0	0	9	26.47	1	2.94	0	0	<10-4 c
20-24	407	61.2	12	1.8	179	26.92	66	9.92	1	0.15
25-29	780	67.71	16	1.39	197	17.1	145	12.59	14	1.22
30-34	808	65.21	18	1.45	153	12.35	234	18.89	26	2.1
35-39	361	57.48	6	0.96	38	6.05	194	30.89	29	4.62
≥40	181	60.94	5	1.68	6	2.02	85	28.62	20	6.73
Marital status
Married	2110	63.15	47	1.41	380	11.37	716	21.43	88	2.63	<10-4
Unmarried	451	67.01	10	1.49	201	29.87	9	1.34	2	0.3
Birth place
Shanghai	966	68.9	31	2.21	164	11.7	231	16.48	10	0.71	<10-4
Outside of Shanghai	1595	61.04	26	1	418	16	494	18.91	80	3.06
Education attainment
Collage or above	1487	74.5	26	1.3	292	14.63	180	9.02	11	0.55	<10-4 c
High school	302	61.89	4	0.82	82	16.8	93	19.06	7	1.43
Middle school	203	60.78	9	2.69	67	20.06	55	16.47	0	0
Primary school or lower	569	47.54	18	1.5	141	11.78	397	33.17	72	6.02
Occupation
Employed	2042	65.87	42	1.35	432	13.94	528	17.03	56	1.81	<10-4
Self-employed	215	55.56	4	1.03	62	16.02	86	22.22	20	5.17
Unemployed	304	57.58	11	2.08	88	16.67	111	21.02	14	2.65
Personal annual income (RMB)
<50,000	1113	57.7	22	1.14	272	14.1	458	23.74	64	3.32	<10-4
50,000-100,000	940	68.86	25	1.83	204	14.95	180	13.19	16	1.17
>100,000	508	70.85	10	1.39	102	14.23	87	12.13	10	1.39
OCPs, Oral contraceptive pills; LNG-EC, Levonorgestrel emergency contraception; IUD, Intrauterine device.
a The sum does not necessarily equal the sample size for all variables because of missing data.
b Row precentages were used.
c Fisher exect tests were used.
